# Supplementary material for: Retrieval of UVB aerosol extinction profiles from the ground-based Langley Mobile Ozone Lidar (LMOL) system
Source: Copernicus journal article supplement (doi:10.5194/amt-2021-307), 2021-10-14
Supplement: Supplementary file 1 [file amt-2021-307-supplement.pdf]

Supplement:

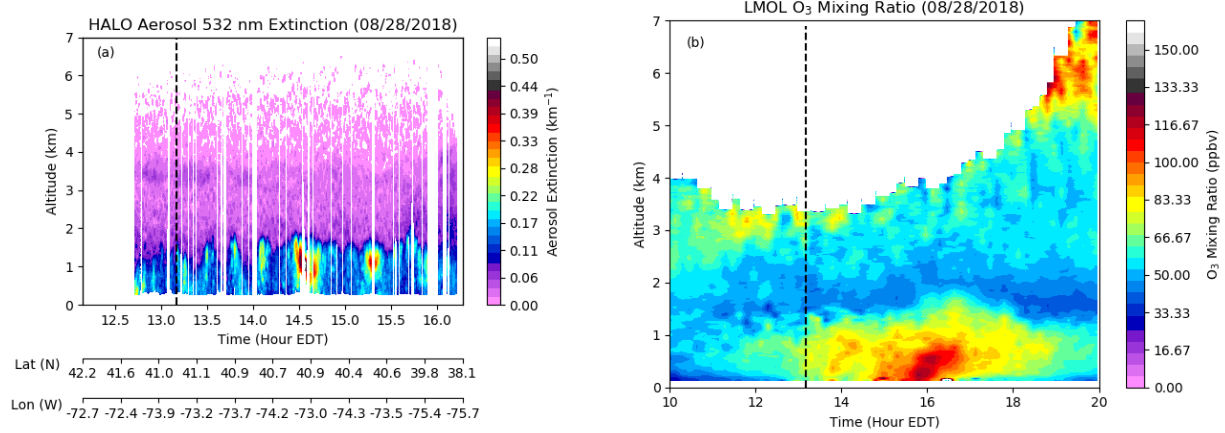

Figure S1: (a) The HALO aerosol extinction curtain plot on August 28 afternoon and (b) the LMOL O<sub>3</sub> measurement on August 28. The black vertical line shows the coincidence measurement when HALO overpass LMOL at 13.17 EDT.
