# Supplementary material for: Retrieval of UVB aerosol extinction profiles from the ground-based Langley Mobile Ozone Lidar (LMOL) system
Source: Copernicus journal article supplement (doi:10.5194/amt-2021-307), 2021-10-14
Supplement: Supplementary file [file amt-2021-307-AC2-supplement.pdf]

1 \*\*\*Reviewer's comments are in black\*\*\*

2 \*\*\*Answers to the reviewer's comment are in blue\*\*\*

### 3 **Comments from reviewer for UV aerosol retrieval paper**

4  
5 **The authors would like to thank the anonymous reviewer for your time and effort to help**  
6 **significantly improve the manuscript.**  
7

8  
9 **RC2: 'Comment on amt-2021-307', Anonymous Referee #2**

10 Review of "Retrieval of UVB aerosol extinction profiles from the ground-based Langley Mobile  
11 Ozone Lidar (LMOL) system" by Lei et al.,

12 This paper describes an algorithm for the aerosol extinction retrieval out of the Langley Mobile  
13 Ozone Lidar (LMOL) as compared to 20 coincident flights with the NASA Langley High Altitude  
14 Lidar Observatory (HALO) 532 nm aerosol extinction product. This work also accomplishes the  
15 first known 292nm aerosol product inter-comparison between HALO and Tropospheric Ozone  
16 Lidar Network (TOLNet) ozone lidar.

17 In general, this paper would benefit from an additional proofreading.

18 Major Comments:  
19

20 In general, this is a very technically developed manuscript. Many of the equations are first  
21 principles and well known in the lidar community. In general, substitution of these for graphical  
22 elements (flow charts, or signal processing chains) would improve the readability. This also  
23 allows the author to highlight sections that are new to this original research.

24 **Answer: We agree and added a diagram as Figure 1 and descriptive text at the beginning of the**  
25 **paper to better illustrate our approach and improve the readability.**

26 **The added flow chart and description of flow chart are as follows:**  
27

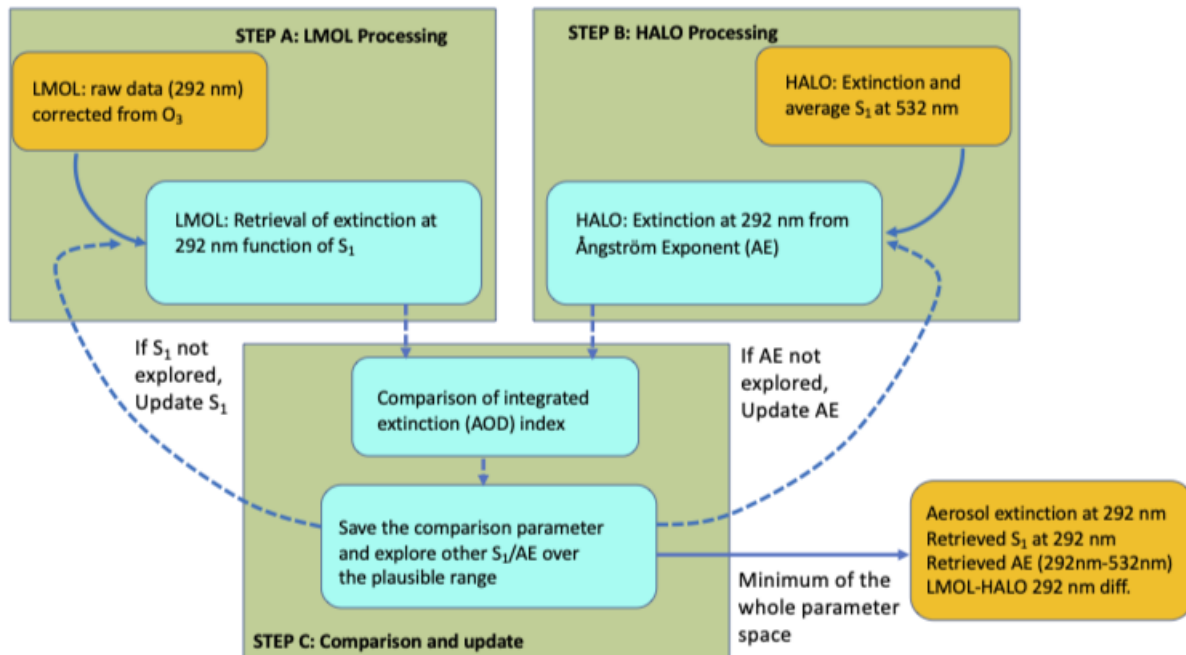

Figure 1. Flow chart for the approach used in this work. The cyan section corresponds to the processing needed for the retrieval of the optimal ( $S_1$ , AE) “To retrieve the  $S_1$  and AE, an iterative method with 3 main steps was used as shown in Figure 1. The first step is the retrieval of the aerosol extinction at 292nm from LMOL. For that, the LMOL raw data are corrected from the ozone absorption. Then the Fernald method (Fernald et al., 1972, Fernald, 1984) is used with an empirical  $S_1$  (which is modified in subsequent iterations to explore the parameter space). For the current study, the impact of the aerosols was low enough that an iterative correction to the  $O_3$  density was not necessary to retrieve the aerosol extinction accurately; for dense aerosols layers, the method described in Browell et al., 1985 would have been used. The second step is the retrieval of the aerosol extinction at 292 nm from HALO. The conversion of the extinction from 532nm to 292nm is done by using an assumed AE which is also modified in subsequent iteration to explore the ( $S_1$ , AE) parameter space. The third step is the comparison of the aerosol extinction from both instruments at 292 nm. The integration of the difference provides the partial aerosol optical depth (AOD) difference, referred later as the partial AOD index. Once the plausible ( $S_1$ , AE) parameter space has been explored, there will be a minimum to the partial AOD index which points to the best ( $S_1$ , AE) for the observed conditions. The LMOL aerosol extinction profile related to optimized  $S_1$  and difference between the LMOL and HALO 292 nm aerosol profile related to the optimized  $S_1$  and AE was also recorded for further analysis.”

My major questions

Is this approach actually novel? The authors describe this as working from between 0.5 and 3.5km – does this indicate it may only work properly or is biased for aloft/transported aerosol layers? Please re-emphasize the importance of this work.

53 Answer: \*\*\*a little more wordsmithing\*\*\*

- 54     ▪ Yes, this approach is unique because it provides a way to obtain lidar ratio at 292 nm and  
55       get the 292 nm aerosol retrieval for LMOL system. It also provides the AE between 292nm  
56       and the intercomparison between the LMOL and HALO system.
- 57     ▪ This work focuses aerosol retrieval between 0.5 to 3.5 km because the restriction of the  
58       lidar measurement which is lower at daytime because of the strong background.
- 59     ▪ Capturing aerosol extinction between 0.5 to 3.5 km is very useful because it will help us  
60       to retrieve the planetary boundary layer (PBL) height and also help us to learn aerosol  
61       property in the lower part of troposphere. Furthermore, aerosol profiling information can  
62       still play an important role for model intercomparisons and satellite retrievals.
- 63     ▪ The extinction in wavelength less than 300 nm is difficult to be retrieved using simple lidar  
64       techniques because the impact of O<sub>3</sub> absorption and lacking information of lidar ratio at  
65       those wavelengths. We proposed the new method to retrieve aerosol extinction at 292  
66       nm using Fernald method with combining the profile of ozone and the profile of 292-nm  
67       elastic backscattering from LMOL. The selection of lidar ratio is very import for the  
68       retrieval of aerosol extinction. However, the lidar ratios less than wavelength of 300 nm  
69       for different aerosol type are rarely discussed according to previous research. So, HALO  
70       results were used to constrain LMOL retrieval to improve lidar ratio accuracy.
- 71     ▪ Combining long-term measurements of HALO and LMOL, a database of lidar ratio for  
72       different aerosol type will be built and can improve LMOL aerosol extinction retrieval  
73       without relying on HALO measurements in future.

74  
75 Can this method be extended to cases outside of when there were HALO overpasses? Otherwise  
76 this does not have as much appeal to the general audiences.

77 Answer: As mentioned above, combining long-term measurements of HALO and LMOL, a database  
78 of lidar ratio for different aerosol type can be developed < 300 nm and improve LMOL aerosol  
79 extinction retrieval without HALO in future.

80 A missed opportunity is using the ceilometer to compare with – this is a 24/7 measurement that  
81 is made very widely over the country. Then use the HALO data to act as a reference for the quality  
82 of the results in this specialized case – and then improve confidence in the ceilometer derived  
83 method.

84 Answer: Although it is not the focus of this work, we agree that applying similar HALO/ground-  
85 lidar analyses to ceilometer networks could prove useful and worth pursuing as a separate study.  
86 However, this is expected to be challenging due to the longer near-IR wavelength and related  
87 signal-to-noise limitations of these systems. As a result, we show a qualitative comparison with  
88 the Westport ceilometer that is shown in Figure 6 (Figure 7 in new version of manuscript). With  
89 respect to the overall approach described in this study, the ceilometer limits would not provide  
90 quantitative benefit since it is not deriving the lidar ratio as a function of height and then requires  
91 the a-priori assumptions that we are trying to avoid when comparing with LMOL.

The author described Canadian wildfire smoke, but I cannot tell clearly from any of the images 1) where the smoke resides, 2) how improved the retrieval is in these areas of smoke, or 3) what effects the data set has made to improving the remote sensing of the optical properties of the aerosols.

Answer:

(1) The measurement was impacted by the Canadian wildfire smoke and the active fire in southeastern United States. As we mentioned in introduction: “The August 28 case was shown in detail because the air quality exceedance during that day was probably caused by the impact of long-range transport of wildfire emissions (Rogers et al., 2020)”. (We encourage the reviewer to check figure 2 and figure 4 for [Rogers et al., 2020 paper](#))

(2) For the wildfire emission case, some cases are directly has smoke layer aloft, but some cases like the August 28 case the smoke is already mixed in the boundary layer and does not appear as a distinct layer. We can tell that our measurement was impacted by smoke according to previous publication (Wu et al., 2021; Rogers et al., 2020; Hung et al., 2020). The August LISTOS lidar, HALO, and AERONET data provided guidance on which days smoke was expected to be present.

(3) The optimized lidar ratio at 292 nm was smaller than lidar ratio at 532 nm, consistent with expectations but also yields the most appropriate quantitative outcome for the aerosol influenced by wildfire emission.

Minor Comments:

L55 – remove ‘a lot’

Answer: We remove it.

L60 - Langley

Answer: We change it. Thank you for reminding us!

L64 “In this paper, the impact of the aerosols was low enough that an aerosol correction to the O<sub>3</sub> density was not necessary; otherwise, an iterative process would have been necessary (Browell et al., 1985)” – Suggest rephrasing this statement. This sounds like it basically voids the need for this work. Although the ozone correction to the signals may not reduce accuracy, the authors state the uncertainty in ozone is 10-20% - that must impact the uncertainty of the aerosol correction.

Answer: The objective of the present paper is to characterize the aerosols using the 292 data from LMOL, not specifically to correct the O<sub>3</sub> from aerosol impact. Ultimately, when the

126 technique is validated, this would be a step; however, the validation of the retrieval is partially in  
127 the current paper. With the standard method for correcting the  $O_3$  signal from the aerosol  
128 contribution, (1)  $O_3$  should be retrieved from the raw signal, which (2) allows to correct 292 nm  
129 for (3) retrieving the aerosols extinction. From the aerosol, we could (4), correct the density of  
130  $O_3$ . With that, we could go back to (2) for correcting the signal. The procedure repeats until  
131 convergence.

132 In the present paper, we have conditions that lead to a small correction of  $O_3$  after the step (4),  
133 which in turns gives a negligible change in the aerosols computed in the initial (3).

134 This is what we meant by “aerosol correction to the  $O_3$  density”. We changed into “an iterative  
135 correction to the  $O_3$  density is not necessary to retrieve the aerosols accurately”.

136 L66 – New paragraph for LISTOS

137 Answer: Yes, we give new paragraph for LISTOS instruction.

138 L105 - rather than ‘raw’ data, what is being analyzed? Range corrected-Elastic Backscatter  
139 Profiles at 292?

140 Answer: The  $O_3$  corrected range corrected-elastic backscatter profile at 292 nm was analyzed.

141 L132 – LISTOS

142 Answer: We change it. Thanks for reminding us!

143 2.4 The Ceilometer located nearby LMOL – consider moving this up to 2.2 since it was co-located  
144 with 2.1.

145 Answer: That make sense. We move it.

146 L160 – Lidar ratio is introduced here but is frequently used in the text up until this point.

147 Answer: We define the lidar ratio at the first time we use it in the text (at line 51).

148 Section 3 could benefit from some sort of “flow chart” graphic. Or illustration of the changes in  
149 the corrected signals after certain steps.

150 Answer: We add the flow chart in the introduction part (figure 1 in new version of manuscript)  
151 which will be helpful to improve the readability of section 3.

152 Figure 1 caption - (a) August 28fternoon needs to be fixed. Are these derived vertically or for a  
153 column?

154 Answer: Yes, we fix it as “August 28 afternoon ...”. It is vertically average value derived from  
155 HALO S1 profile.

156 Table 1- 521nm?

157 Answer: It is 532 nm. We changed it in new manuscript. Thank you for reminding us!

158 L280 – “These results show that by using the selected S1 and AE in Table 1, LMOL has the  
159 capability to retrieve aerosol extinction in 292nm with reasonable accuracy.”, What is the  
160 estimated uncertainty of this retrieved aerosol component?

161 Answer: We could see the difference between the retrieved LMOL aerosol profile and the  
162 converted HALO aerosol extinction are less than 10 % when use the optimized lidar ratio and  
163 Angstrom exponent for August 28 afternoon case. The uncertainty of using lidar ratio other than  
164 the optimized value for retrieval was show in figure 3 (b) (figure 4 (b) in the new version of  
165 manuscript).

166 Figure 6 – Are you able to convert the ceilometer to 292nm? Please label in the plot title. Is the  
167 PBL height detection “in-house” for the ceilometer or the Vaisala standard product?

168 Answer: We think it is hard to convert the ceilometer to 292 nm because the ceilometer only  
169 provides the backscatter signal at 910 nm. We have added the wavelength information in the  
170 plot title for each curtain plot in figure 6 ( figure 7 in new version of manuscript). The PBL height  
171 is from the Vaisala standard product which could obtained from the LISTOS archive data. We  
172 have added related information in section 4.2 in the manuscript.

173 Figure 7 - total uncertainty (blue) – should be black. Why is the analog Det Nois decreasing with  
174 altitude? Wouldn't you expect as the signal to be much higher compared to background noise  
175 values, that the uncertainty would increase? Is there a need to show both analog and photon  
176 counting here?

177 Answer:

- 178     ▪ Yes, the total uncertainty is black. We changed it in the caption.
- 179     ▪ I think we need to point to equation 15 (equation 16 in the new version manuscript) here:  
180       the detection noise is the coupling between the  $U_{det}$ , which increases with altitude and  
181       the differential of the retrieved value with the detection rate, which could be decreasing  
182       with altitude. We set up a value for the aerosols, fixes, at the higher altitude, then we go  
183       down from there. The uncertainties are therefore adding while going downwards and are  
184       considered stable at high altitude.
- 185     ▪ We think it is better to show both analog and photon counting channel here because the  
186       analog and photon counting are used for retrieval for different altitude ranges.

187

188 Figure 7 In some cases in Photon Counting it looks like the uncertainty in using 60sr is less than  
189 using the technique applied in this paper. Is that the case?

190 Answer:

191 In the sensitivity study, we apply the uncertainty algorithm to a specific lidar ratio and with an  
192 uncertainty on that lidar ratio. If the retrieval equations were perfectly linear, the uncertainty of  
193 the retrieval (in percent) would be proportional to the uncertainty of the lidar ratio (in percent)  
194 and therefore constant with altitude. In that case, a lidar ratio of 60 +/-40% or 35 +/-40% would  
195 lead to the same uncertainty in the retrieved aerosol extinction.

196 This is obviously not the case: a change of the lidar ratio leads to a change in both the retrieved  
197 extinction and absorption, which could lead to uncertainties higher or lower depending upon the  
198 density of aerosols and the amount of aerosols above.

199 Please note that in the sensitivity study, we assume the 40% uncertainty, i.e. without knowing  
200 the optimized value of the lidar ratio which would fit better with the dedicated instrumentation.  
201 The error is therefore composed both of the possible bias (poorly known ratio) and the noise due  
202 to the change in altitude of the ratio.

203 Conclusions – rather than say ‘good’, please use specifics from the retrieval results.  
204 Consequently, further research is needed to characterize S1 AE at UVB wavelengths – what  
205 exactly is needed?

206 Answer: We add specific result in conclusion instead of using “good” or “very good”. The new  
207 statement are as follows:

208

209 *“The inter-comparison between HALO and LMOL aerosol products showed an agreement within*  
210 *10% up to 3 km after the optimization method was applied in the case of August 28, 2018. The*  
211 *retrieved LMOL 292 nm aerosol was also compared with co-located ceilometer and CCNY aerosol*  
212 *lidar. It shows that LMOL could capture a consistent aerosol feature and mixing layer evolution.*  
213 *Error analysis shows that the uncertainty from  $O_3$  and  $S_1$  dominate the 292 nm aerosol retrieval*  
214 *and needs to be carefully considered in the retrievals of aerosol profiles of all the TOLNET Lidars.*  
215 *In cases when there is no HALO data, a-priori determinations from differing aerosol types based*  
216 *on this kind of analysis work will serve to provide reasonable  $S_1$ . Consequently, further research*  
217 *is needed to characterize  $S_1$  and AE at UVB wavelengths: first, an effort should be made on*  
218 *determining the variation of  $S_1$  and AE with altitude by carefully addressing the uncertainties in*  
219 *the HALO  $S_1$  profile products; second, additional co-located LMOL/HSRL measurements should be*  
220 *done to evaluate  $S_1$  and AE for different aerosol types (smoke, dust, marine aerosol, and pollutant*  
221 *aerosol). This characterization could ultimately enable the use of equipment with a better*  
222 *availability than an HSRL (examples of such equipment could be the MPLs) to provide the ancillary*  
223 *data necessary for the aerosol extinction retrieval.”*
